# Supplementary material
Source: PubMed Central journal article supplement (PMC4875794)
Supplement: NIHMS774824-supplement-1.pdf [file NIHMS774824-supplement-1.pdf]

**Supplemental Table S1: Primers used in this study**

| Primers                   | 5'-3' Sequence                                                           |
|---------------------------|--------------------------------------------------------------------------|
| IgtG_F                    | CTATCTGTACGACGTTTTGAAAATTGC                                              |
| IgtG_R                    | CCCCGTATTTAAAGGATAAAAGGCAAAA                                             |
| IgtG530                   | CGCATTACCCTACCCCTCACGCAC                                                 |
| IgtG1729                  | TCTGTACGACGTTTTGAAAATTGC                                                 |
| Lal-6                     | GCGACAGGGACGGGTTGTAGTTCAG                                                |
| Lal-7                     | GGCACGGAACGCTACACATTGGAT                                                 |
| IgtA Fwd-Ext              | AGGCAATTTCCAACTGCTTTGTCCGA                                               |
| IgtA Rev-Ext              | GTTTGGCGGTATTCTAGGCTGTGCGAAC                                             |
| IgtC Fwd-Ext              | TATTTGAGCGGAGTGGAAAAAGCCTGC                                              |
| IgtC Rev-Ext              | ATCCAAGTTGCGCCAAGTCTGATTAC                                               |
| IgtD Fwd-Ext              | TCAAAATGTCTCGGAATGGGTGGAAC                                               |
| IgtD Rev-Ext              | AGCCAAGCTGATAACGTGGTTTTGCAT                                              |
| IgtA-On Fwd <sup>A</sup>  | ATTGGCAAAGTCGGG <u><b>CGG</b></u> <u><b>AGG</b></u> TGGATATATTGCGCGC     |
| IgtA-On Rev <sup>A</sup>  | GCGCGCAATATATCC <u><b>ACC</b></u> <u><b>TCC</b></u> GCCCGACTTTGCCAAT     |
| IgtC-On Fwd <sup>A</sup>  | CGCCAATTTGCGGGG <u><b>CGG</b></u> <u><b>AGG</b></u> TAAATATCCGCTTT       |
| IgtC-On Rev <sup>A</sup>  | AAAGCGGATATT <u><b>ACC</b></u> <u><b>TCC</b></u> GCCCGCAAATTGGCG         |
| IgtC-Off Fwd <sup>A</sup> | CCGCCAATTTGCGG <u><b>TGA</b></u> GGGGGGGGTAATA                           |
| IgtC-Off Rev <sup>A</sup> | TATTACCCCCCCCC <u><b>TCA</b></u> CCGCAAATTGGCGG                          |
| IgtD-On Fwd <sup>A</sup>  | GAATTGGCAAAGTCGGG <u><b>CGG</b></u> <u><b>AGG</b></u> TGAATATATTGCGCGCAC |
| IgtD-On Rev <sup>A</sup>  | GTGCGCGCAATATATT <u><b>CACC</b></u> <u><b>TCC</b></u> GCCCGACTTTGCCAATTC |
| IgtA Fwd-Int <sup>B</sup> | <i>AAAAGCGGGACAGCCGTATCAAAATCCCGGGATTGAGAAAAATCGTGGGCGAGATGG</i>         |
| IgtA Rev-Int <sup>B</sup> | <i>CCATCTCGCCACGATTTTCTCAATCCCGGGATTTTGATACGGCTGTCCCGCTTTT</i>           |
| IgtC Fwd-Int <sup>B</sup> | <i>GAGATGGACATCGTATTTGCGGCAGACCCCGGGCCTTATGGGATACCGATTTGGGCGGTA</i>      |
| IgtC Rev-Int <sup>B</sup> | <i>TACCGCCCAAATCGGTATCCCATAAGGCCCGGGTCTGCCGCAAATACGATGTCCATCTC</i>       |
| IgtD Fwd-Int <sup>B</sup> | <i>GTGAATCAGACTTGCGCAACTTGGATCCCGGGCATGAAGACATTGTCGCCGTTTTCCCT</i>       |
| IgtD Rev-Int <sup>B</sup> | <i>AGGGAAAACGGCGACAATGTCTTCATGCCCGGGATCCAAGTTGCGCCAAGTCTGATTAC</i>       |

<sup>A</sup> Indicates primers for mutagenesis; Single base substitutions are **underlined in bold**, consecutive bases *underlined in italics* span short deletions that render the sequence in frame for full length protein translation

<sup>B</sup> SmaI site – CCCGGG; Primer regions corresponding to the indicated *Igt* are indicated in **bold**, overlap regions are indicated in *italics*

**Supplementary Table S2:** Plasmids used in this study

| Plasmids               | Relevant characteristics and construction details                                                                                                                                                                                                                                                                                                                                                          | Ref.       |
|------------------------|------------------------------------------------------------------------------------------------------------------------------------------------------------------------------------------------------------------------------------------------------------------------------------------------------------------------------------------------------------------------------------------------------------|------------|
| pFLOB4270 <sup>2</sup> | Two-step mutagenesis system used to construct unmarked deletions or mutations. Contains an <i>Erm<sup>R</sup>-Sm<sup>S</sup></i> cassette that encodes resistance to <i>Erm</i> and sensitivity to <i>Sm</i> ( <i>rpsL<sub>F62</sub></i> )<br><br>Used to construct unmarked mutations in <i>IgtG</i> , <i>C</i> , <i>A</i> and <i>D</i>                                                                   | (1)        |
| <b>IgtG constructs</b> |                                                                                                                                                                                                                                                                                                                                                                                                            |            |
| pRYGW2                 | Contains wildtype <i>IgtG</i> from Ng strain 398079 amplified with primers IgtG530 and IgtG1729 in pCR2.1-TOPO (Invitrogen, Carlsbad, CA). Analogous to pRYGW1, described previously (2)<br><br>Used to create pRYGW2ES1                                                                                                                                                                                   | This study |
| pRYGW2ES1              | pRYGW2 with the <i>Erm<sup>R</sup>-Sm<sup>S</sup></i> cassette that encodes resistance to <i>Erm</i> ( <i>ErmC</i> ) and sensitivity to <i>Sm</i> ( <i>rpsL<sub>F62</sub></i> ) from pFLOB4300 <sup>2</sup> . The <i>Erm<sup>R</sup>-Sm<sup>S</sup></i> cassette was liberated with <i>PvuII</i> and cloned into the <i>StuI</i> site of pRYGW2.<br><br>Used to construct MS11 4/3/1 <i>IgtG</i> locked ON | This study |
| plgtG+                 | Contains <i>IgtG</i> locked ON ( <i>C</i> <sub>11</sub> → CCCCTCCGCCA); <i>IgtG</i> + was amplified from Ng F62 <i>dlgtA IgtG</i> + (3) with primers <i>lal6</i> and <i>lal7</i> and cloned into in to pCR2.1 TOPO (Invitrogen).<br><br>Used to create <i>IgtG</i> locked ON                                                                                                                               | This study |
| <b>IgtA constructs</b> |                                                                                                                                                                                                                                                                                                                                                                                                            |            |
| plgtA                  | Contains wildtype MS11 4/3/1 <i>IgtA</i> amplified with <i>IgtA Fwd-Ext</i> and <i>IgtA Rev-Ext</i> and cloned into pCR2.1 TOPO TOPO (Life Technologies, USA)<br><br>Used as a template to construct <i>IgtA</i> locked on by site directed mutagenesis with primers <i>IgtA-ON FWD</i> and <i>IgtA-ON REV</i>                                                                                             | This study |
| plgtA-ES               | Contains <i>IgtA</i> with <i>Erm<sup>R</sup>-Sm<sup>S</sup></i> from pFLOB4300 inserted into an engineered <i>SmaI</i> site in the homopolymeric tract<br><br>Used to construct unmarked <i>IgtA</i> mutations (ON and OFF)                                                                                                                                                                                | This study |
| plgtA-ON               | Contains <i>IgtA</i> with homopolymeric tract locked ON ( <i>G</i> <sub>12</sub> → GGGCGGAGGTGG) by SDM (Quick change Lightning Multi SDM kit; Agilent Tech) with primers <i>IgtA-ON FWD</i> and <i>IgtA-ON REV</i><br>Used to generate <i>IgtA</i> locked ON                                                                                                                                              | This study |
| plgtA-del              | Contains WT <i>IgtA</i> with 417 bp deletion corresponding to bp 50-467 of the coding sequence. The deletion was created by double digesting <i>plgtA</i> with <i>BbsI</i> and <i>SspI</i> and ligating the larger fragment.<br>Used to generate <i>IgtA</i> locked OFF (deletion)                                                                                                                         | This study |
| <b>IgtC constructs</b> |                                                                                                                                                                                                                                                                                                                                                                                                            |            |
| plgtC                  | Contains wildtype MS11 4/3/1 <i>IgtC</i> amplified with <i>IgtC Fwd-Ext</i> and <i>IgtC Rev-Ext</i> and cloned into pCR2.1 TOPO TOPO (Life Technologies, USA).<br><br>Used to construct <i>plgtC-ON</i> and <i>plgtC-OFF</i>                                                                                                                                                                               | This study |
| plgtC-ES               | Contains <i>IgtC</i> with <i>Erm<sup>R</sup>-Sm<sup>S</sup></i> from pFLOB4300 inserted into an engineered <i>SmaI</i> site in the homopolymeric tract<br><br>Used to construct unmarked <i>IgtC</i> mutations (ON and OFF)                                                                                                                                                                                | This study |
| plgtC-ON               | Contains <i>IgtC</i> with homopolymeric tract locked ON ( <i>G</i> <sub>14</sub> → GGGGCGGAGG) (by SDM (Quick change Lightning Multi SDM kit; Agilent Tech) with primers <i>IgtC-ON FWD</i> and <i>IgtC-ON REV</i><br>Used to generate <i>IgtC</i> locked ON                                                                                                                                               | This study |
| plgtC-OFF              | Contains <i>IgtC</i> with homopolymeric tract locked OFF ( <i>G</i> <sub>14</sub> → GGTGAGGGGGGGG) by SDM (Quick change Lightning Multi SDM kit; Agilent Tech) with primers <i>IgtC-OFF FWD</i> and <i>IgtC-OFF REV</i><br>Used to generate <i>IgtC</i> locked OFF                                                                                                                                         | This study |
| <b>IgtD constructs</b> |                                                                                                                                                                                                                                                                                                                                                                                                            |            |
| plgtD                  | Contains wildtype MS11 4/3/1 <i>IgtD</i> amplified with <i>IgtD Fwd-Ext</i> and <i>IgtD Rev-Ext</i> and cloned into pCR2.1 TOPO (Life Technologies, USA)<br><br>Used to construct <i>plgtD-del</i> and <i>plgtD-ON</i>                                                                                                                                                                                     | This study |
| plgtD-ES               | Contains <i>IgtD</i> with <i>Erm<sup>R</sup>-Sm<sup>S</sup></i> from pFLOB4300 inserted into an engineered <i>SmaI</i> site in the homopolymeric tract<br><br>Used to construct unmarked <i>IgtD</i> mutations (ON and OFF)                                                                                                                                                                                | This study |
| plgtD-ON               | Contains <i>IgtD</i> with homopolymeric tract locked ON ( <i>G</i> <sub>13</sub> → GGGCGGAGGTG) by SDM (Quick change Lightning Multi SDM kit; Agilent Tech) with primers <i>IgtD-ON FWD</i> and <i>IgtD-ON REV</i><br>Used to generate <i>IgtD</i> locked ON                                                                                                                                               | This study |
| plgtD-del              | Contains <i>IgtD</i> with 744 bp deletion corresponding to bp 64-808 of the coding sequence. The deletion was created by digesting <i>plgtD</i> with <i>PfI</i> and <i>NdeI</i> and ligating the larger fragment.<br>Used to generate <i>IgtD</i> locked OFF (deletion)                                                                                                                                    | This study |

<sup>1</sup> All primer sequences are provided in Supplementary Table S2

<sup>2</sup> pFLOB4300 kindly provided by Dr. Janne Cannon, University of North Carolina, Chapel Hill

## REFERENCES

- Johnston, D. M., and J. G. Cannon. 1999. Construction of mutant strains of *Neisseria gonorrhoeae* lacking new antibiotic resistance markers using a two gene cassette with positive and negative selection. *Gene* 236: 179-184.
- Gulati, S., B. Zheng, G. W. Reed, X. Su, A. D. Cox, F. St Michael, J. Stupak, L. A. Lewis, S. Ram, and P. A. Rice. 2013. Immunization against a Saccharide Epitope Accelerates Clearance of Experimental Gonococcal Infection. *PLoS Pathog* 9: e1003559.
- Tong, Y., V. Reinhold, B. Reinhold, B. Brandt, and D. C. Stein. 2001. Structural and immunochemical characterization of the lipooligosaccharides expressed by *Neisseria subflava* 44. *J Bacteriol* 183: 942-950.

**Supplemental Table S3: Negative ion MS data and proposed compositions of O-deacylated LPS from *N. gonorrhoea* strains.** Average mass units were used for calculation of molecular weight based on proposed composition as follows: Hex, 162.15; Hep, 192.17; HexNAc, 203.19; PEtn, 123.05; Kdo, 220.18; Lipid A-OH, 952.00. <sup>1</sup>The relative intensity is expressed as relative to the most populous glycoform / phosphoform.

| Strain   | Observed Ions ( <i>m/z</i> ) |                      | Molecular Mass (Da) |            | Rel. Int. <sup>1</sup> | Proposed Composition                         |
|----------|------------------------------|----------------------|---------------------|------------|------------------------|----------------------------------------------|
|          | (M-3H) <sup>3-</sup>         | (M-2H) <sup>2-</sup> | Observed            | Calculated |                        |                                              |
| 5-Hex/G+ | 997.2                        | 1497.6               | 2995.9              | 2993.8     | 1.0                    | 5Hex, 2HexNAc, 2Hep, 2Kdo, Lipid A-OH        |
|          | 1065.0                       | -                    | 3198.0              | 3197.0     | 0.4                    | 5Hex, 3HexNAc, 2Hep, 2Kdo, Lipid A-OH        |
| 5-Hex/G- | 888.9                        | 1333.8               | 2669.7              | 2669.6     | 0.1                    | 3Hex, 2HexNAc, 2Hep, 2Kdo, Lipid A-OH        |
|          | 930.0                        | 1395.3               | 2792.8              | 2792.6     | 1.0                    | 3Hex, 2HexNAc, 2Hep, 2Kdo, PEtn, Lipid A-OH  |
|          | 970.8                        | -                    | 2915.4              | 2915.6     | 0.3                    | 3Hex, 2HexNAc, 2Hep, 2Kdo, 2PEtn, Lipid A-OH |
|          | 997.8                        | 1496.7               | 2995.9              | 2995.7     | 0.7                    | 3Hex, 3HexNAc, 2Hep, 2Kdo, PEtn, Lipid A-OH  |
|          | 1039.2                       | 1558.5               | 3119.8              | 3118.8     | 0.2                    | 3Hex, 3HexNAc, 2Hep, 2Kdo, 2PEtn, Lipid A-OH |
| 4-Hex/G+ | 997.2                        | 1495.8               | 2994.1              | 2993.8     | 1.0                    | 5Hex, 2HexNAc, 2Hep, 2Kdo, Lipid A-OH        |
| 4-Hex/G- | 888.9                        | 1333.8               | 2669.7              | 2669.6     | 0.1                    | 3Hex, 2HexNAc, 2Hep, 2Kdo, Lipid A-OH        |
|          | 930.0                        | 1395.3               | 2792.8              | 2792.6     | 1.0                    | 3Hex, 2HexNAc, 2Hep, 2Kdo, PEtn, Lipid A-OH  |
| 3-Hex/G+ | 875.5                        | 1313.5               | 2629.3              | 2630.5     | 0.4                    | 4Hex, HexNAc, 2Hep, 2Kdo, Lipid A-OH         |
|          | 930.0                        | 1394.7               | 2792.2              | 2792.6     | 1.0                    | 5Hex, HexNAc, 2Hep, 2Kdo, Lipid A-OH         |
|          | 983.7                        | 1475.7               | 2953.8              | 2954.8     | 1.0                    | 6Hex, HexNAc, 2Hep, 2Kdo, Lipid A-OH         |
|          |                              | 1496.5               | 2995.0              | 2995.8     | 0.2                    | 5Hex, 2HexNAc, 2Hep, 2Kdo, Lipid A-OH        |
|          | 1051.5                       |                      | 3157.5              | 3157.9     | 0.1                    | 6Hex, 2HexNAc, 2Hep, 2Kdo, Lipid A-OH        |
| 3-Hex/G- | -                            | 1233.6               | 2469.2              | 2468.3     | 0.5                    | 3Hex, HexNAc, 2Hep, 2Kdo, Lipid A-OH         |
|          | 864.3                        | 1295.4               | 2594.4              | 2591.3     | 1.0                    | 3Hex, HexNAc, 2Hep, 2Kdo, PEtn, Lipid A-OH   |
| 2-Hex/G+ | 874.8                        | 1313.4               | 2628.1              | 2630.4     | 1.0                    | 4Hex, HexNAc, 2Hep, 2Kdo, Lipid A-OH         |
| 2-Hex/G- | 808.4                        | 1212.8               | 2427.9              | 2429.1     | 1.0                    | 2Hex, HexNAc, 2Hep, 2Kdo, PEtn, Lipid A-OH   |

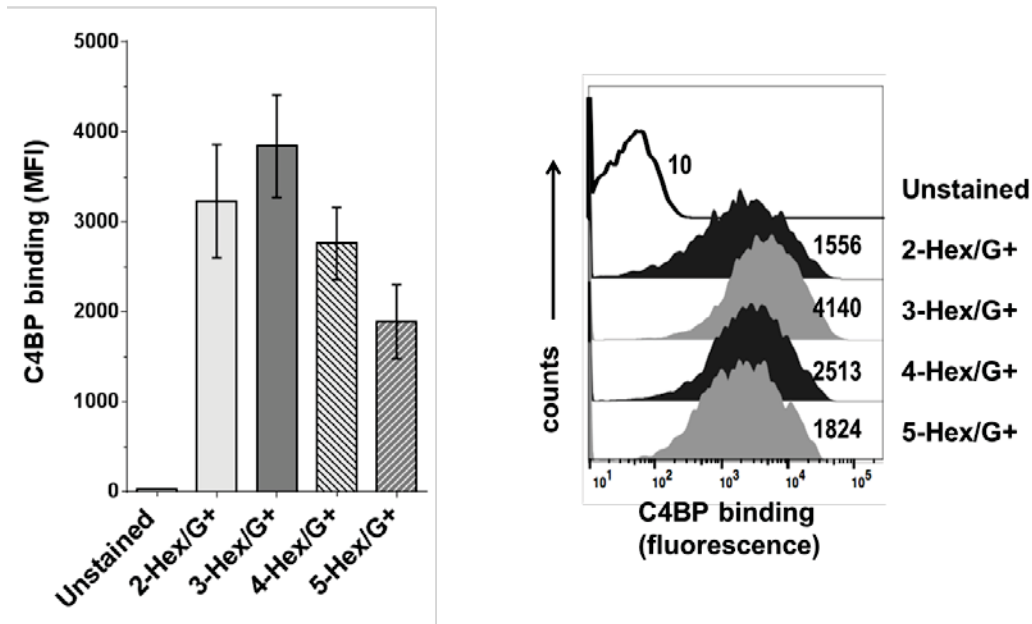

**Supplemental Figure S1.** C4BP binding to the MS11 Igt 'ON' (G+) mutants. Bacteria were incubated with heat inactivated human complement for 30 min at 37 °C and bound C4BP was detected with anti-human C4BP mAb 67, followed by the biotinylated goat anti-mouse IgG (Molecular Probes), followed by Neuravidin conjugated DyLight 633 (ThermoFisher Scientific). Fluorescence was measured using a BD LSRII. Representative histograms from one of five separate experiments are shown. The number alongside each histogram indicates the median fluorescence intensity of the entire bacterial population.
